# Supplementary material
Source: PubMed Central journal article supplement (PMC6905085)
Supplement: NIHMS1543970-supplement-2.pdf [file NIHMS1543970-supplement-2.pdf]

# Supplementary Table S1

| Name                     | Targets                                                                       | Target pathway                                                                              |
|--------------------------|-------------------------------------------------------------------------------|---------------------------------------------------------------------------------------------|
| ABT-199 ( Venetoclax )   | BCL2                                                                          |                                                                                             |
| GDC-0152                 | IAP                                                                           | Apoptosis                                                                                   |
| Birinapant               | Caspase, IAP                                                                  |                                                                                             |
| Capecitabine             | DNA/RNA Synthesis, Nucleoside antimetabolite/analog                           |                                                                                             |
| Dacarbazine              | POLA2, mmp9, dna/rna synthesis                                                |                                                                                             |
| AZD2461                  | PARP                                                                          |                                                                                             |
| Streptozotocin           | DNA/RNA Synthesis, DNA alkylator                                              |                                                                                             |
| Teniposide               | Topoisomerase                                                                 |                                                                                             |
| DAUNORUBICIN /Cerubidine | ADCs cytotoxin, Topoisomerase, Autophagy, ADC Cytotoxin, Telomerase           |                                                                                             |
| Eloxatin                 | DNA/RNA Synthesis, DNA alkylator/crosslinker, Autophagy                       |                                                                                             |
| Nelarabine               | Nucleoside antimetabolite/analog, POLA1, DNA/RNA Synthesis                    |                                                                                             |
| Ftorafur                 | DNA synthesis, Nucleoside antimetabolite/analog                               |                                                                                             |
| Adrucil                  | DNA/RNA Synthesis, DNA antimetabolite                                         |                                                                                             |
| Mitoxantrone             | Topoisomerase,PKC,topoisomerase II                                            |                                                                                             |
| Mercaptopurine           | Amidophosphoribosyltransferase,, IMPDH, HPRT                                  |                                                                                             |
| I-BET-762                | BRD2, BRD3, BRD4                                                              |                                                                                             |
| Raltitrexed              | dna/rna synthesis, thymidylate synthase, nucleoside antimetabolite            |                                                                                             |
| Docetaxel                | Microtubule stabiliser                                                        | Mitosis                                                                                     |
| Paclitaxel               | Microtubule stabiliser                                                        |                                                                                             |
| Topotecan                | Topoisomerase I                                                               |                                                                                             |
| Ifosfamide               | DNA/RNA Synthesis, DNA alkylator/crosslinker                                  |                                                                                             |
| Hydroxyurea              | RRM2, RRM1, NFKB1                                                             | DNA Damage/DNA Repair                                                                       |
| Beta-Lapachone           | Topoisomerase inhibitor                                                       |                                                                                             |
| Floxuridine              | thymidylate synthase                                                          |                                                                                             |
| Carboplatin              | DNA alkylation                                                                |                                                                                             |
| Cytarabine               | Antimetabolite                                                                |                                                                                             |
| Etoposide                | TOP2                                                                          |                                                                                             |
| Gemcitabine              | Pyrimidine antimetabolite                                                     | DNA replication                                                                             |
| Bleomycin                | dsDNA break induction                                                         |                                                                                             |
| Cisplatin                | DNA crosslinker                                                               |                                                                                             |
| Adriamycine              | TOP2A                                                                         |                                                                                             |
| Selumetinib              | MEK1, MEK2                                                                    |                                                                                             |
| GDC-0994                 | MAPK1, MAPK3, ERK                                                             |                                                                                             |
| PD184352                 | mek1,mek2                                                                     | ERK MAPK signaling                                                                          |
| TAK-733                  | MEK                                                                           |                                                                                             |
| MEK162                   | MEK, autophagy, MAP2K1                                                        |                                                                                             |
| Plerixafor               | CXCR                                                                          | GPCR/G protein, Immunology/Inflammation                                                     |
| NLG919                   | IDO                                                                           |                                                                                             |
| Isotretinoin             | RAR/RXR                                                                       | metabolism                                                                                  |
| Cladribine               | Adenosine Deaminase,DNA/RNA Synthesis                                         |                                                                                             |
| Imiquimod                | autophagy, Immunology & Inflammation related, TLR-7, Toll-like Receptor (TLR) | Immunology/Inflammation, Autophagy, Angiogenesis                                            |
| Fludarabine              | BAZ2A, BAZ2B                                                                  | NoRC negatively regulates rRNA expression                                                   |
| Vincristine              | NROB, NR5A1                                                                   | Nuclear Receptor transcription pathway,Transcriptional regulation of pluripotent stem cells |
| Tretinoin                | Retinoic acid                                                                 | Other                                                                                       |
| Tideglusib               | GSK-3                                                                         |                                                                                             |
| Rapamycin                | MTORC1                                                                        | PI3K/Akt/mTOR pathway                                                                       |
| Batimastat               | MMP1, mmp9, mmp3, mmp2, adam17, mmp13,mmp14, fcer2                            | Proteases                                                                                   |
| Lenalidomide             | CRBN                                                                          | Protein stability and degradation                                                           |
| Sorafenib                | PDGFR, KIT, VEGFR, RAF                                                        |                                                                                             |
| Imatinib                 | ABL, KIT, PDGFR                                                               |                                                                                             |
| Sunitinib                | PDGFR, KIT, VEGFR, FLT3, RET, CSF1R                                           | Protein Tyrosine Kinase/RTK                                                                 |
| ASP3026                  | ALK                                                                           |                                                                                             |
| CO-1686 ( Rociletinib )  | EGFR                                                                          |                                                                                             |
| LGK-974                  | Wnt/beta-catenin, PORCN                                                       | setm cell & wnt                                                                             |
| BMS-833923               | Smoothened, SMO, Hedgehog/Smoothened                                          |                                                                                             |
| LDK378 ( Ceritinib )     | ALK, IGF-1R, IR, INSR                                                         | TGF-beta/Smad inhibitor, IGF-1R inhibitor                                                   |
| Carmofur                 | ASAH1, LMNA, SMN1, CYP2D6, MAPK3, CYP3A4                                      | others                                                                                      |

## Supplementary Table S2

| IR signaling_active(seq_mi/ctr) |                |              |                                     |
|---------------------------------|----------------|--------------|-------------------------------------|
| Symbol                          | Expr Log Ratio | Expr p-value | Expr False Discovery Rate (q-value) |
| ASIC1                           | -0.702         | 1.50E-04     | 1.47E-03                            |
| ASIC3                           | -1.575         | 5.00E-05     | 5.64E-04                            |
| ATM                             | -0.866         | 1.50E-03     | 9.43E-03                            |
| FGFR4                           | 0.716          | 2.50E-04     | 2.25E-03                            |
| FOXO3                           | -0.551         | 1.40E-03     | 8.95E-03                            |
| FOXO4                           | -1.052         | 5.00E-05     | 5.64E-04                            |
| GAB1                            | -0.582         | 1.35E-03     | 8.70E-03                            |
| INPP5F                          | -0.683         | 1.00E-04     | 1.03E-03                            |
| INPPL1                          | -0.644         | 5.00E-05     | 5.64E-04                            |
| INSR                            | -0.668         | 5.00E-05     | 5.64E-04                            |
| JAK2                            | -0.609         | 3.00E-04     | 2.60E-03                            |
| NRAS                            | 0.516          | 1.20E-03     | 7.94E-03                            |
| PPP1R14C                        | 1.018          | 7.00E-04     | 5.14E-03                            |
| RRAS                            | -0.883         | 5.00E-05     | 5.64E-04                            |
| SCNN1G                          | 1.418          | 5.00E-05     | 5.64E-04                            |
| SHC1                            | -0.604         | 2.50E-04     | 2.25E-03                            |
| SOCS3                           | -0.983         | 2.00E-04     | 1.87E-03                            |
| STX4                            | -0.586         | 4.50E-04     | 3.62E-03                            |
| SYNJ1                           | -0.721         | 5.00E-05     | 5.64E-04                            |
| TRIP10                          | -0.546         | 7.50E-04     | 5.44E-03                            |
| TSC1                            | -1.043         | 5.00E-05     | 5.64E-04                            |
| VAMP2                           | -0.873         | 5.00E-05     | 5.64E-04                            |

## Supplementary Table S3

| Gene Name | ctr (FPKM) | met+ima (FPKM) |
|-----------|------------|----------------|
| PLK1      | 83.9018    | 51.0837        |
| AIM1      | 0.187736   | 0.151921       |
| ENY2      | 61.7965    | 43.576         |
| CCNB1     | 98.5317    | 67.7125        |
| RB1       | 18.6943    | 17.529         |
| NDUFB4    | 197.483    | 173.548        |
| PCNA      | 150.903    | 65.3481        |
| CDK1      | 149.808    | 109.444        |
| MTOR      | 15.4292    | 14.8959        |
| RPS6KB1   | 16.866     | 13.3142        |
| WEE1      | 17.786     | 13.7584        |
| FOXM1     | 30.1695    | 23.2938        |
| RAD51     | 9.83347    | 4.88441        |
| CHEK1     | 10.3985    | 8.08393        |
| TTF1      | 7.45859    | 6.19494        |
| EIF4EBP1  | 106.159    | 97.9585        |
| EIF4G1    | 79.8991    | 61.4513        |
| ATR       | 9.30752    | 6.558          |
| PIK3R1    | 6.57232    | 5.16374        |
| MDM2      | 15.7141    | 12.8106        |
| EIF4E     | 36.9136    | 28.8045        |
| FOSL1     | 0.320483   | 0.0980078      |
| CDC25C    | 20.9011    | 20.0284        |
| YBX1      | 607.95     | 584.034        |
| PTPN11    | 25.9717    | 21.685         |
| HSPA1A    | 0.8577234  | 0.2090981      |
| HSBP1     | 49.298     | 41.9088        |
| SERPINE1  | 0.0272234  | 0.029388       |
| ANXA7     | 47.8987    | 51.8733        |
| ROCK1     | 14.0533    | 17.2269        |
| TRIM25    | 11.6338    | 13.0278        |
| YAP1      | 25.2353    | 28.7207        |
| HSPA5     | 140.035    | 197.057        |
| L1CAM     | 0.0799495  | 0.161713       |
| AR        | 1.3915     | 2.12637        |
| ANXA1     | 253.792    | 364.431        |
| IGF1R     | 9.44008    | 7.80514        |
| MMP2      | 3.59576    | 7.27314        |
| CDH1      | 0.0060136  | 0.00648128     |
| G6PD      | 16.2975    | 20.2097        |
| BIRC3     | 0.174806   | 0.244264       |
| CDH3      | 0.208618   | 0.28229        |
| CTNNB1    | 74.3754    | 75.8514        |
| PRKCA     | 1.11406    | 1.34477        |
| CLDN7     | 1.84194    | 2.17728        |
| STAT3     | 6.75725    | 10.2096        |
| SOD2      | 50.0888    | 54.4138        |
| COL6A1    | 14.8577    | 24.2445        |

## Supplementary Table S4 RPPA

| Protein            | NormLog2_MedianCentered value |        |        |        |         |        | p-value |
|--------------------|-------------------------------|--------|--------|--------|---------|--------|---------|
|                    | ctr                           |        |        |        | met+ima |        |         |
| Rb_pS807_S811      | 0.627                         | 0.551  | 0.732  | -1.275 | -1.505  | -0.904 | 0.001   |
| Cdc2_pY15          | 0.465                         | 0.295  | 0.390  | -0.368 | -0.572  | -0.343 | 0.001   |
| mTOR_pS2448        | 0.692                         | 0.571  | 0.632  | -0.297 | -0.595  | -0.212 | 0.001   |
| Chk1_pS296         | 0.453                         | 0.408  | 0.148  | -0.141 | -0.153  | -0.166 | 0.007   |
| 4E-BP1_pS65        | 0.353                         | 0.492  | 0.191  | -0.316 | -0.549  | -0.151 | 0.009   |
| ATR_pS428          | 0.391                         | 0.311  | 0.086  | -0.124 | -0.080  | -0.131 | 0.016   |
| PI3K-p85           | 0.262                         | 0.171  | 0.275  | -0.056 | -0.155  | 0.066  | 0.017   |
| MDM2_pS166         | 0.093                         | 0.203  | 0.479  | -0.268 | -0.279  | -0.065 | 0.026   |
| eIF4E_pS209        | 0.431                         | 0.428  | 0.106  | -0.104 | -0.163  | 0.005  | 0.026   |
| YB1_pS102          | 0.035                         | 0.084  | 0.104  | -0.168 | -0.158  | -0.009 | 0.028   |
| SHP-2_pY542        | 0.538                         | 0.324  | 0.109  | -0.013 | -0.119  | -0.015 | 0.045   |
| HSP27_pS82         | 0.445                         | 0.140  | 0.228  | 0.047  | -0.244  | -0.047 | 0.048   |
| YAP_pS127          | -0.052                        | -0.028 | -0.197 | 0.349  | 0.478   | 0.326  | 0.003   |
| b-Catenin_pT41_S45 | -0.036                        | -0.038 | -0.029 | 0.047  | 0.071   | 0.002  | 0.022   |
| Stat3_pY705        | -0.009                        | 0.048  | -0.056 | 0.108  | 0.162   | 0.085  | 0.030   |

## Supplementary Table S5

| Sample Number | 5-year Survival | M stage | Prognosis |
|---------------|-----------------|---------|-----------|
| Ohali_8       | Good            | M0      | Good      |
| Ohali_9       | Good            | M0      | Good      |
| Ohali_10      | Good            | M0      | Good      |
| Ohali_11      | Good            | M0      | Good      |
| Ohali_12      | Good            | M0      | Good      |
| Ohali_13      | Good            | M0      | Good      |
| Ohali_14      | Good            | M0      | Good      |
| Ohali_20      | Good            | M0      | Good      |
| Ohali_1       | Poor            | M0      | Poor      |
| Ohali_2       | Poor            | M0      | Poor      |
| Ohali_3       | Poor            | M0      | Poor      |
| Ohali_4       | Poor            | M1      | Good      |
| Ohali_5       | Poor            | M0      | Poor      |
| Ohali_6       | Poor            | M1      | Good      |
| Ohali_7       | Poor            | M1      | Poor      |
| Ohali_15      | Poor            | M0      | Poor      |
| Ohali_16      | Poor            | M1      | Good      |
| Ohali_17      | Poor            | M1      | Good      |
| Ohali_18      | Poor            | M1      | Good      |
| Ohali_19      | Poor            | M1      | Poor      |
| Ferreira_2    | Poor            | M0      | Poor      |
| Ferreira_5    | Poor            | M1      | Poor      |
| Ferreira_9    | Good            | M1      | Poor      |
| Ferreira_12   | Poor            | M0      | Poor      |

## Supplementary Materials: Antibodies used in this work

| #  | Ab Name            | Company        | Catalog # | Species |
|----|--------------------|----------------|-----------|---------|
| 1  | Akt_pS473          | CST            | 9271      | Rabbit  |
| 2  | b-Actin            | CST            | 4970      | Rabbit  |
| 3  | Caspase-3          | Abcam          | ab32042   | Rabbit  |
| 4  | cdc2_pY15          | CST            | 4539      | Rabbit  |
| 5  | Chk1_pS296         | Abcam          | ab79758   | Rabbit  |
| 6  | Hif-1-alpha        | BD Biosciences | 610958    | Mouse   |
| 7  | IGF1R_pY1135_Y1136 | CST            | 3024      | Rabbit  |
| 8  | MDM2_pS166         | CST            | 3521      | Rabbit  |
| 9  | mTOR               | CST            | 2983      | Rabbit  |
| 10 | mTOR_pS2448        | CST            | 2971      | Rabbit  |
| 11 | p70-S6K_pT389      | CST            | 9205      | Rabbit  |
| 12 | p70-S6K1           | Abcam          | ab32529   | Rabbit  |
| 13 | PI3K-p85           | Millipore      | 06-195    | Rabbit  |
| 14 | Rictor_pT1135      | CST            | 3806      | Rabbit  |
| 15 | Stat3_pY705        | CST            | 9145      | Rabbit  |
| 16 | VEGFR-2            | CST            | 2479      | Rabbit  |
| 17 | BNIP3              | CST            | 44060     | Rabbit  |
| 18 | NDRG1              | CST            | 3217      | Rabbit  |
| 19 | MXI1               | Abcam          | 28740     | Rabbit  |
| 20 | ATF7IP             | Santa Cruz     | 166753    | Rabbit  |
| 21 | ALDOC              | Sigma          | HPA003282 | Rabbit  |
| 22 | FLI1               | CST            | 35980     | Rabbit  |
| 23 | 4E-BP1_pS65        | CST            | 9456      | Rabbit  |
| 24 | eIF4E_pS209        | Abcam          | ab76256   | Rabbit  |
| 25 | ATR_pS428          | Abcam          | ab178407  | Rabbit  |
| 26 | p32                | CST            | 9662      | Rabbit  |
| 27 | p17                | Santa Cruz     | 271028    | Rabbit  |
| 28 | ki67               | CST            | 9027      | Rabbit  |
| 29 | caspase-3          | CST            | 9662      | Rabbit  |
| 30 | Anti-CD99          | Abcam          | EPR3096   | Rabbit  |
