# Supplementary material
Source: PubMed Central journal article supplement (PMC6905085)

# Supplementary Fig.S1

**A**

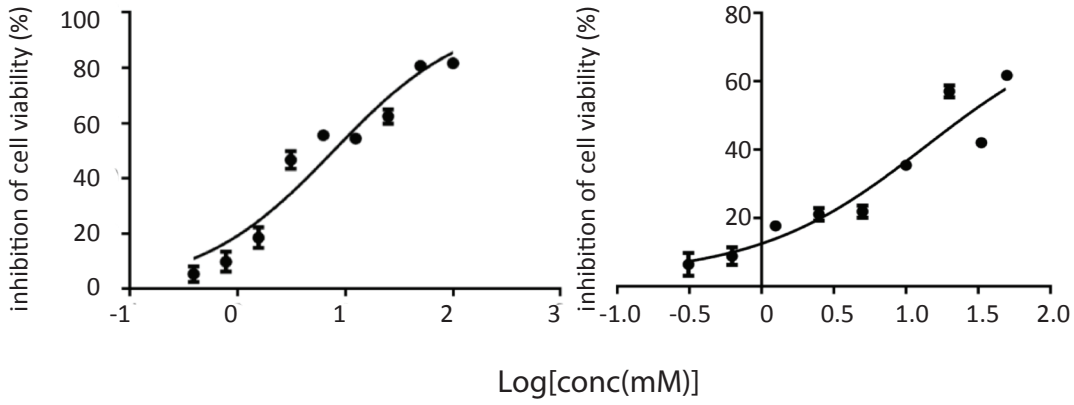

**B**

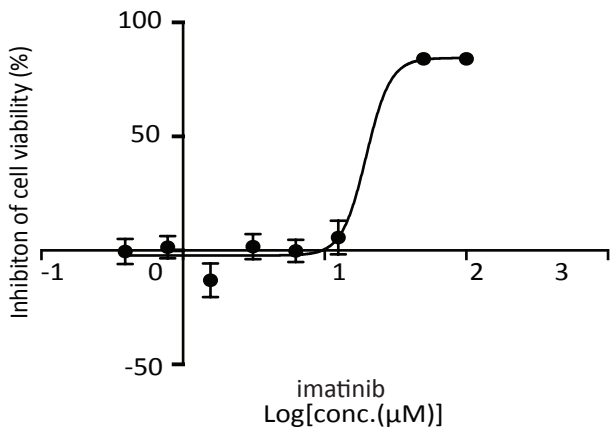

**F**

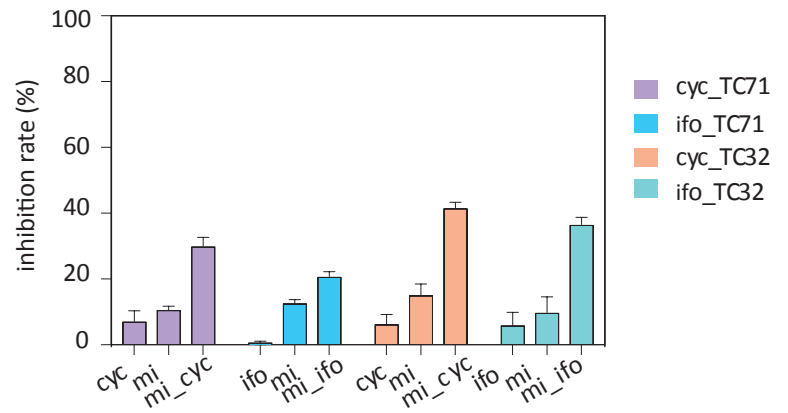

**C**

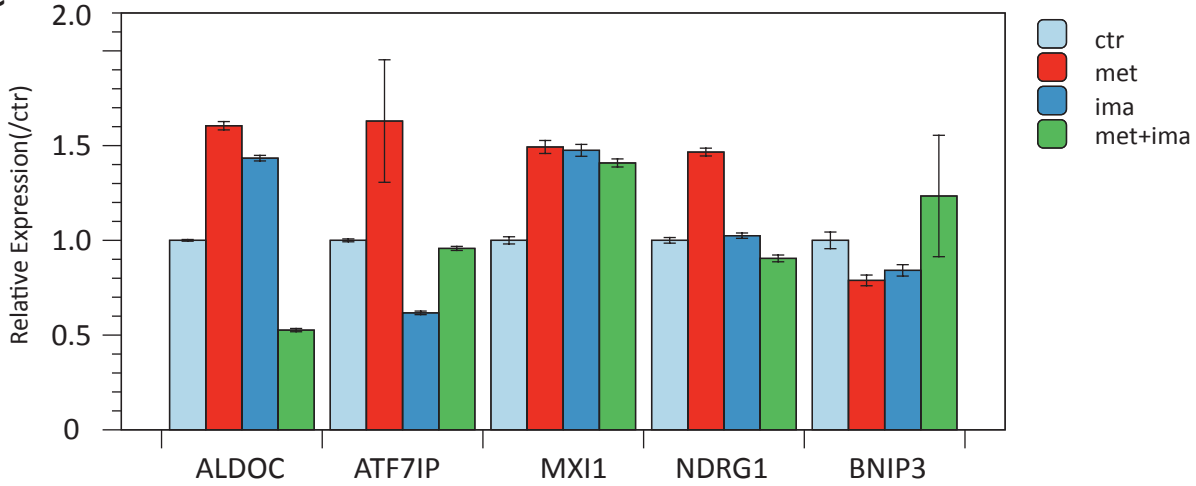

**D**

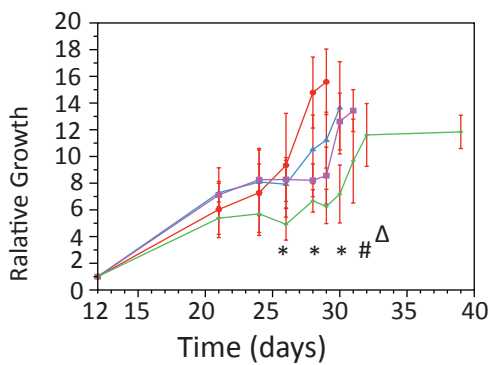

**E**

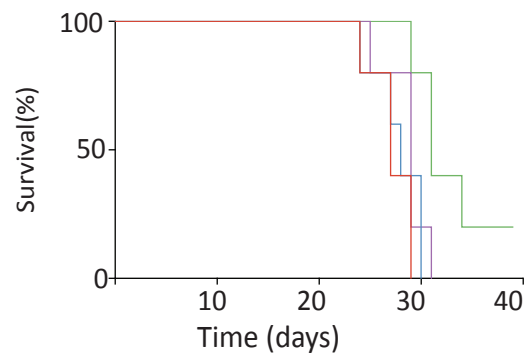

# Supplementary Fig. S2

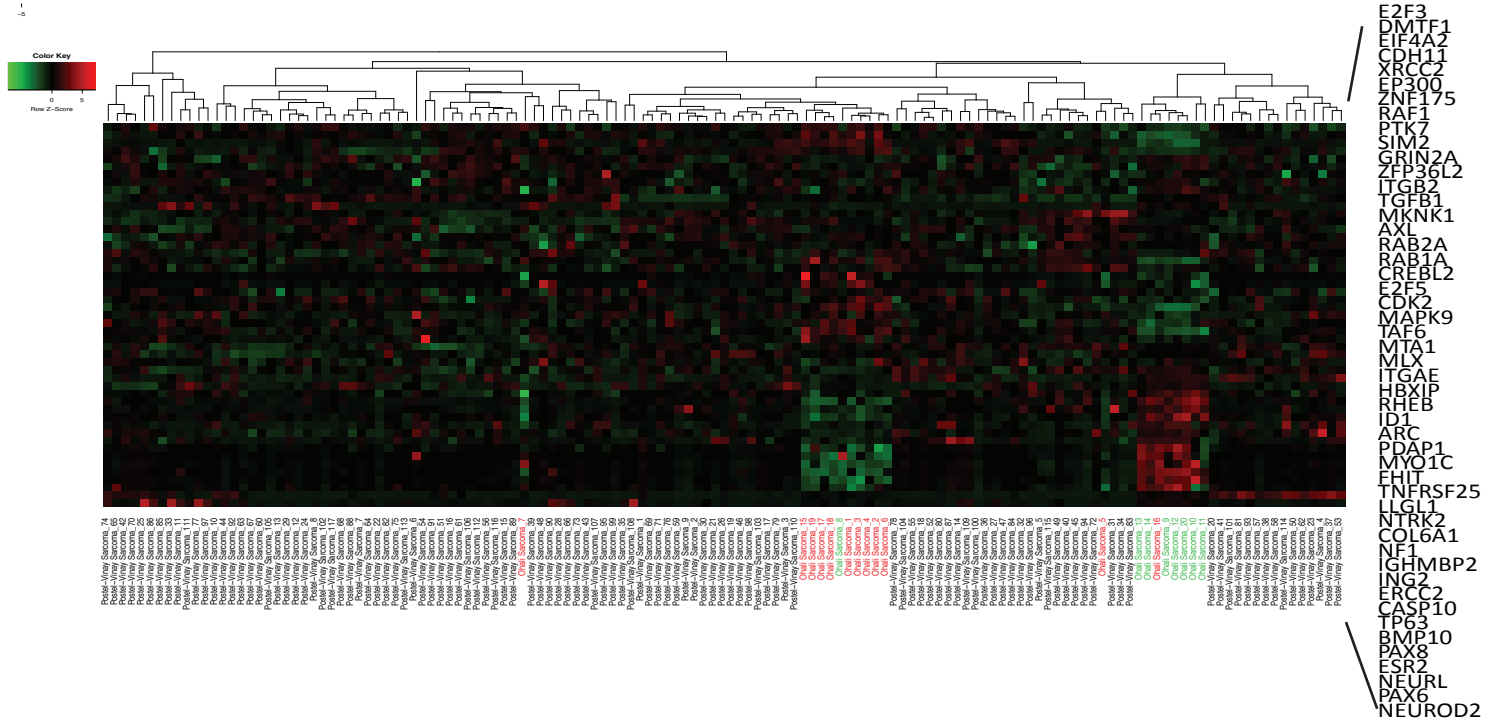

# Supplementary Fig.S3

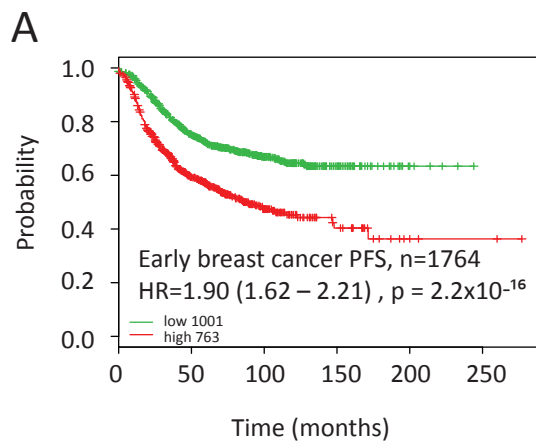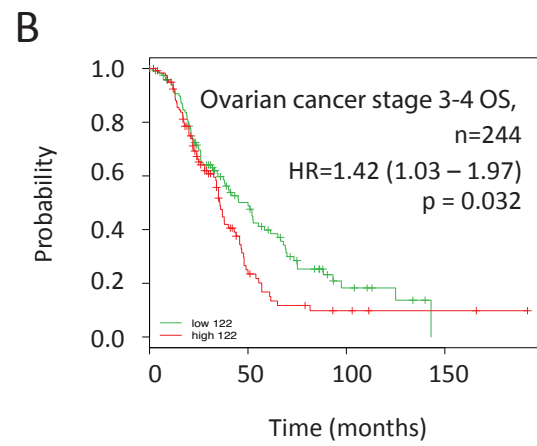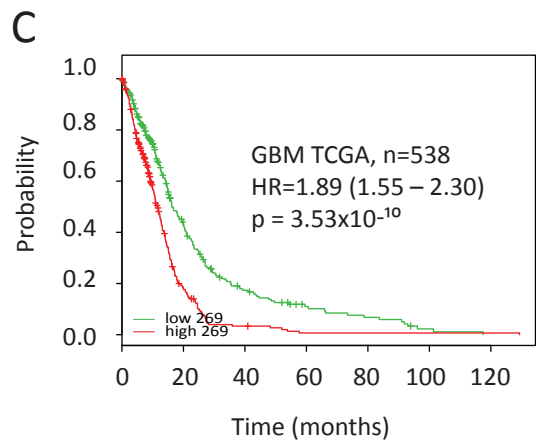

Supplement: NIHMS1543970-supplement-3.pdf [file NIHMS1543970-supplement-3.pdf]
